# Supplementary material
Source: publisher figshare collection journal article supplement (https://gsajournals.figshare.com/articles/dataset/_/14384912)
Supplement: Supplementary file 1 [file 1]

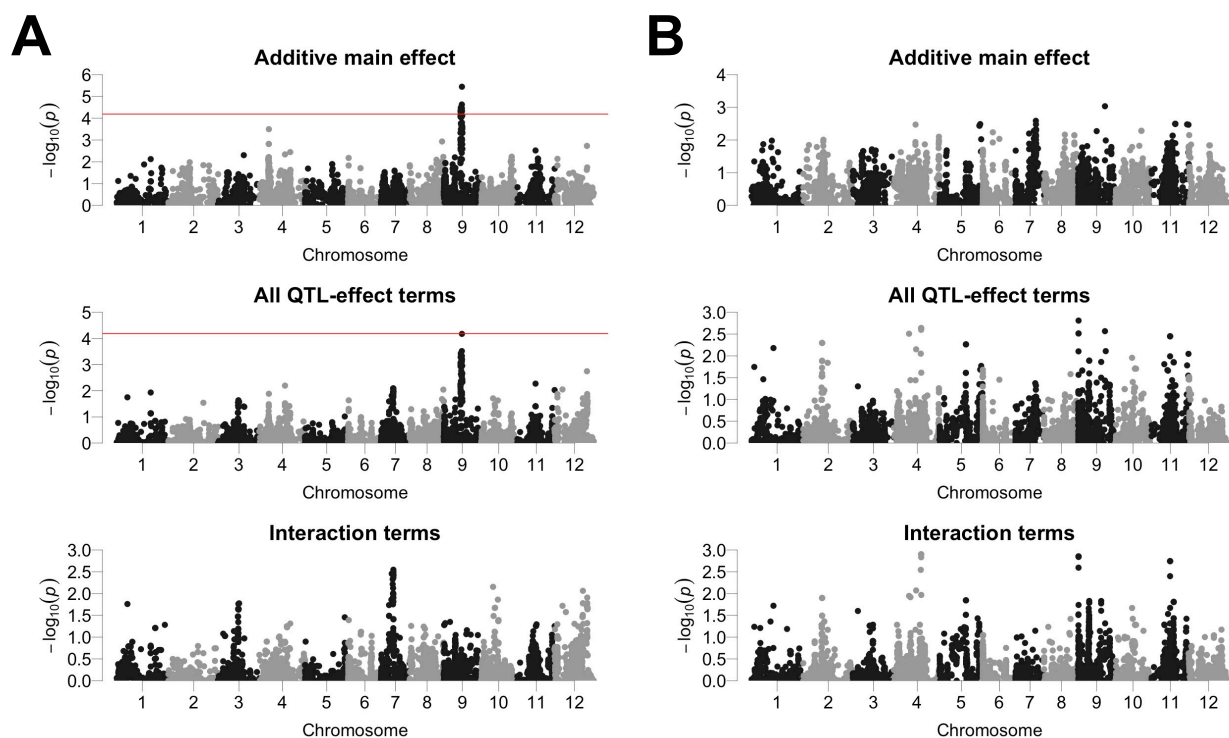

**Figure S2. Genome-wide association study Manhattan plots of tomato agronomic traits.** Red horizontal lines indicate the genome-wide significance threshold (false discovery rate < 0.05). (A) Average fruit weight. (B) Fruit set ratio.
